1  
2  
3  
4  
5  
6  
7  
8  
9  
10  
11  
12  
13  
14  
15  
16  
17  
18  
19  
20  
21  
22  
23  
24  
25  
26  
27  
28

Perceived levels of mental health service accessibility and associated factors among psychiatric outpatients in Amanuel Mental Specialized Hospital, Addis Ababa, Ethiopia, 2024.

Authors

1. Surafel Ayenew, Department of Research and Training, Amanuel Mental Specialized Hospital, Addis Ababa, Ethiopia.  
Email: - [suraayenew@gmail.com](mailto:suraayenew@gmail.com), Phone number +251919130061
2. Kibrom Haile, Department of Research and Training, Amanuel Mental Specialized Hospital, Addis Ababa, Ethiopia  
Email: - [kibromhaile4@gmail.com](mailto:kibromhaile4@gmail.com) Phone number +251924046451
3. Weldehawariat Leyew, Department of Research and Training, Amanuel Mental Specialized Hospital, Addis Ababa, Ethiopia  
Email: - [woldehawariatttt@gmail.com](mailto:woldehawariatttt@gmail.com) Phone number +251933921761
4. Solomon Abate, Department of Research and Training, Amanuel Mental Specialized Hospital, Addis Ababa, Ethiopia  
Email: - [yanetsolomon10@gmail.com](mailto:yanetsolomon10@gmail.com) Phone number +251944199171
5. Asrat Chaka, Department of Psychiatry, Amanuel Mental Specialized Hospital, Addis Ababa, Ethiopia.  
Email: - [asratchaka2016@gmail.com](mailto:asratchaka2016@gmail.com) Phone number +251904050187

Corresponding author: - [suraayenew@gmail.com](mailto:suraayenew@gmail.com)

## 29 Abstract

30 **Background:** -We live in multifaceted, dynamic and interconnected world in which the  
31 importance of physical, mental, and social wellbeing has not been well emphasized. Given the  
32 intricate nature of life, it is clear that mental health is essential to the welfare of people,  
33 communities, nations, and the entire planet. The main tactic to address unmet mental health  
34 needs has been to integrate psychiatric treatment into primary care, however this approach has  
35 been ineffective, and psychiatric services have been concentrated in Ethiopia and other major  
36 cities in sub-Saharan Africa. This study aimed to assess the perceived levels of mental health  
37 service accessibility and associated factors among psychiatric outpatients at Amanuel mental  
38 specialized hospital, Addis Ababa, Ethiopia, 2024.

39 **Objective:** To assess the perceived levels of mental health service accessibility and associated  
40 factors among psychiatric outpatients at Amanuel Mental Specialized Hospital, Addis Ababa,  
41 Ethiopia, 2024.

42 **Methods:**-Institution-based cross-sectional study were employed from 03 January, to 03  
43 February 2024. A total of 415 participants were participated. A systematic sampling technique  
44 was used. Binary logistic regression model was fitted to identify the factors associated with  
45 service accessibility. Adjusted odds ratio (AOR) with 95% confidence interval (CI) and p-value  
46 less than 0.05 during multivariable logistic regression were used to declare the factors associated  
47 with the outcome variable.

48 **Results:** - The perceived level of mental health service accessibility was 10.4%; 95% CI: (7.5%,  
49 25. 9%).Service accessibility was associated with urban resident [(AOR = 3.563, 95% CI: (1.065,  
50 11.9155)], and Medication access [(AOR = 2.604, 95%CI: (1.220, 5.555)].

51 **Conclusions and recommendations:** - The study observed that the prevalence of perceived  
52 service accessibility was found to be low in this study. Availability of medication and urban  
53 resident are the factors associated with perceived level of mental health service accessibility.  
54 There is a need to have proper coordination and cooperation among various mental health service  
55 providers.

56 **Keywords:** Magnitude, Accessibility, barriers, Amanuel mental specialized hospital.

57

## 58 Introduction

59 Access to health care has a significant impact on overall health at all stages of life. With  
60 adequate use of health services, health problems can be detected and diagnosed earlier so that  
61 they can be treated more proactively. This, in turn has a positive effect on chronic diseases and  
62 life expectancy. Most healthcare systems around the world emphasize minimizing barriers to  
63 citizens' access to healthcare, but many barriers systematically impede such a goal. Some  
64 important barriers are related to the fact that services are not sufficiently accessible, physically  
65 available, or reasonably priced(1). Lack of access to and use of mental health services remains  
66 particularly visible in low- and middle-income countries (2).

67 According to the World Health Organization (WHO), mental health is defined as a state of well-  
68 being in which each person realizes their potential, is able to cope with normal life stresses, is  
69 able to work productively and fruitfully, and is able to participate in their community (3). Thus,  
70 mental health is an integral part of health, including various activities that are directly and  
71 indirectly related to the promotion of mental well-being, the prevention and treatment of mental  
72 health disorders, and the rehabilitation of people with mental health problems (4). Although  
73 mental health disorders are known to be one of the greatest burdens of disability, with an  
74 estimated 37% of all healthy life years lost due to mental health disorders, it is recommended  
75 that mental health services be available at every possible level, mainly in communities and  
76 medical facilities(5).

77 Global burden of disease studies indicate that more than 5 percent of disability-adjusted life  
78 years (DALYs) and up to 15.7 percent of disability-adjusted lives (YLDs) worldwide are related  
79 to mental health problems (6,7). Despite the global upward trend in mental illness, this problem  
80 has not been properly treated as a physical illness and is largely neglected in many parts of the

81 world, especially in low and middle-income countries (LMIC). This deficiency results in the  
82 limited, inadequate and inequitable provision of MH services(8), and would widen the care gap.  
83 This growing gap causes many health, social, and economic problems (9). Research has shown  
84 that the main barriers to providing MH services are information systems (10,11), financial and  
85 resource barriers(12), a lack of evidence-based policy and practice, and prevention, integration,  
86 and structural barriers(13).

87 In Ethiopia, neuropsychiatric disorders are estimated to account for 5.8 percent of the disease  
88 burden (14). Depression accounts for about 6.5 percent of illnesses (15). Mental health disorders  
89 accounted for about 11 percent of cases, mostly in rural areas. Schizophrenia and depression are  
90 among the ten most severe illnesses (16). It is often more difficult for people with mental health  
91 problems to access mental health services due to various attitudinal and structural barriers (7). To  
92 reduce treatment, many countries have taken the initiative to integrate mental health services into  
93 primary health care (17). Despite efforts to increase access to mental health services, treatment  
94 rates for mental illness remain low in LMICs. Low treatment rates may be due in part to a  
95 number of barriers to integration, including limited resources and low public demand for mental  
96 health services (18). Integrating psychiatric care with primary care, a key strategy to address  
97 unmet mental health needs, has remained inadequate, and psychiatric services are concentrated in  
98 large cities in sub-Saharan Africa. It is no different in Ethiopia, where the majority of care is  
99 provided by the Amanuel Mental Hospital, the country's only psychiatric hospital, located in  
100 Addis Ababa. Despite the development of several regional psychiatric units, there is evidence of  
101 limited use of services in the wider community (19). Therefore, this study is aimed to assessing  
102 the levels of mental health services accessibility and associated factors among psychiatric  
103 outpatients of Amanuel mental specialized hospital.

## 104 **Method and materials**

### 105 **Study area, design, and period**

106 An institution based cross-sectional study was conducted from 03January to 03February 2024 in  
107 Amanuel Mental Specialized Hospital, Addis Ababa, Ethiopia. It is found in the capital city,  
108 which is the only specialized hospital that gives service for several years on mental health and  
109 related cases. The hospital has 239 beds including 11 private wing beds and 23 emergency beds,  
110 and also it has 13 outpatient departments (OPDs). On average, 10,320 patients receive the  
111 service per month, and the majority of patients stay in the hospital with their family members.  
112 The hospital is also playing a pivotal role as a continuous professional development center for  
113 psychiatric professionals of different levels.

### 114 **Population**

115 All patients attending the psychiatric outpatient department of Amanuel mental specialized  
116 hospital were the source population. And all patients who attended at a psychiatric outpatient  
117 department, during the study period were the study population. All patients attending psychiatric  
118 outpatient with an age of 18 years and above were included in the study on the other hand,  
119 Patients who were critically ill and unable to respond were excluded.

### 120 **Sample size determination and sampling technique**

121 The sample size was calculated using a single population proportion formula, taking into account  
122 the following assumptions:

123 Level of significance ( $\alpha$ ) =5% (at a confidence level of 95%), marginal error d=5% and P=0.5  
124 (since there was no published research conducted in levels of mental health service accessibility).

125 The Z value is 1.96 (n=sample size, P=proportion and d=marginal error). The sample size was

126 384. By considering 10% non-responses, the total sample size was 423. Systematic sampling  
127 technique was used to select representative samples of patients who had follow up at the  
128 outpatient department of Amanuel Mental Specialized Hospital. The first participant was  
129 selected by lottery method, then continued by every 23 intervals (k). The data were collected  
130 from every 23 other patients on follow up.

### 131 **Data collection techniques, variable measurement, and quality control**

132 Structured Interviewer-administered questionnaire was used to collect the data. The  
133 questionnaire was prepared in English, translated to local language Amharic and translated back  
134 to English to ensure its consistency. The questionnaire includes socio-demographic  
135 characteristics, structural barriers, community barriers, provider/service user barriers, and  
136 healthcare related factors. Service accessibility was the dependent variable in this study and was  
137 operationally defined as services that are provided in a timely, continuous manner, develop close  
138 to the community and taking into account individual needs and preferences. Patients' diagnosis  
139 and medication was taken from the patients' medical record. We were also calculating Cronbach  
140 alpha ( $\alpha$ ) to check the reliability of measuring tool (VIF=0.97). One-day training on the basic  
141 techniques of data collection was given to data collectors and supervisors before the actual data  
142 collection period. Two Master of Science who had prior data collection experiences and  
143 knowledge of Amharic and Afan-Oromo language was recruited for data collectors and  
144 supervisors, respectively. Data collectors were also briefed on each item included in the data  
145 collection tool. The data collectors were observed daily, and the completed questionnaires were  
146 checked daily by the supervisor and the principal investigator. We pre-tested the questionnaire  
147 on 5% of the sample at Eka kotebe general hospital before the actual data collection period. The  
148 necessary modification was done based on the pre-test findings.

## 149 **Data processing and analysis**

150 Coded and verified data were entered into a computer using EPI Data version 3.1 and imported  
151 into Statistical Package for Social Sciences (SPSS) Windows software version 21. Descriptive  
152 statistics such as frequency, percentage, mean, and median were calculated and presented using  
153 tables and graphics. Binary logistic analysis was performed to determine each explanatory  
154 variable, and variables with a p-value less than 0.25 in the bivariate analysis were entered into  
155 the multivariate analysis. A multivariate logistic regression analysis was performed to determine  
156 if there was statistically significant relationship between explanatory variables and outcome  
157 variables. P values less than 0.05 were considered statistically significant, and the strength of  
158 associations was reported as adjusted odds ratio with 95% C.I.

159

160

161

162

163

164

165

166

167

168

169

170

171

172

173

174 **Results**

175 **Socio-demographic factors of respondents**

176 A total of 415 respondents participated in this study yielding a response rate of 98%. Male study  
177 participants accounted for 58.6 %. The majority (38.6%) of the respondents were 26-35 years  
178 old. Most (47%) of study participants were married by marital status. Regarding the residents,  
179 88.2% of the respondents were from urban. Of the total study participant, 29.6% participants  
180 were private employees (Table 1).

181 **Table 1. Socio-demographic characteristics of psychiatric outpatients in Amanuel mental**  
182 **specialized hospital, Addis Ababa, Ethiopia 2024 (n= 415)**

| <b>Variables</b>      | <b>Category</b>            | <b>Frequency</b> | <b>Percentage</b> |
|-----------------------|----------------------------|------------------|-------------------|
| <b>Sex</b>            | <b>Male</b>                | <b>243</b>       | <b>58.6%</b>      |
|                       | <b>Female</b>              | <b>172</b>       | <b>41.4%</b>      |
| <b>Age category</b>   | <b>&lt;26</b>              | <b>108</b>       | <b>26%</b>        |
|                       | <b>26-35</b>               | <b>160</b>       | <b>38.6%</b>      |
|                       | <b>&gt;35</b>              | <b>147</b>       | <b>35.4%</b>      |
| <b>Marital status</b> | <b>Married</b>             | <b>195</b>       | <b>47%</b>        |
|                       | <b>Single</b>              | <b>147</b>       | <b>35.4%</b>      |
|                       | <b>Divorced</b>            | <b>30</b>        | <b>7.2%</b>       |
|                       | <b>Widowed</b>             | <b>35</b>        | <b>8.4%</b>       |
|                       | <b>Separated</b>           | <b>8</b>         | <b>1.9%</b>       |
| <b>Occupation</b>     | <b>Unemployed</b>          | <b>88</b>        | <b>21.2%</b>      |
|                       | <b>Private employee</b>    | <b>123</b>       | <b>29.6%</b>      |
|                       | <b>Farmer</b>              | <b>34</b>        | <b>8.2%</b>       |
|                       | <b>Government employee</b> | <b>93</b>        | <b>22.4%</b>      |
|                       | <b>Daily Laborer</b>       | <b>27</b>        | <b>6.5%</b>       |
|                       | <b>Others</b>              | <b>50</b>        | <b>12%</b>        |
| <b>Resident</b>       | <b>Urban</b>               | <b>366</b>       | <b>88.2%</b>      |
|                       | <b>Rural</b>               | <b>49</b>        | <b>11.8%</b>      |



183 **Perceived level of mental health Services accessibility**

184 The perceived level of mental health service accessibility was 43(10.4%; 95 %CI: 7.5, 13.5).

185 Among the study participants, 89.6% had perceived level of service non-accessibility.

186 **Community factors**

187 Among the respondents (71.3%) had received stigma from the community. Regarding the way;  
188 the community treated mentally ill patients, 288(69.4%) were maltreated by the community. The  
189 majority of the respondents, 216(52%), were lived in communities with low economic status  
190 (Table 2.)

191 **Table 2. Community factors affecting perceived level of service accessibility among**  
192 **psychiatric outpatients in Amanuel mental specialized hospital, Addis Ababa, Ethiopia**  
193 **2024 (n= 415)**

| <b>Variables</b>           | <b>Category</b> | <b>Frequency</b> | <b>Percentage</b> |
|----------------------------|-----------------|------------------|-------------------|
| <b>Stigma</b>              | <b>Yes</b>      | <b>296</b>       | <b>71.3%</b>      |
|                            | <b>No</b>       | <b>119</b>       | <b>28.7%</b>      |
| <b>Mal-treatment</b>       | <b>Yes</b>      | <b>288</b>       | <b>69.4%</b>      |
|                            | <b>No</b>       | <b>127</b>       | <b>30.6%</b>      |
| <b>Support structure</b>   | <b>Yes</b>      | <b>187</b>       | <b>45.1%</b>      |
|                            | <b>No</b>       | <b>228</b>       | <b>54.9%</b>      |
| <b>Economic status</b>     | <b>Low</b>      | <b>216</b>       | <b>52%</b>        |
|                            | <b>Medium</b>   | <b>175</b>       | <b>42.2%</b>      |
|                            | <b>High</b>     | <b>24</b>        | <b>5.8%</b>       |
| <b>Traditional healers</b> | <b>Yes</b>      | <b>110</b>       | <b>26.5%</b>      |
|                            | <b>No</b>       | <b>305</b>       | <b>73.5%</b>      |
| <b>Board Support</b>       | <b>Yes</b>      | <b>202</b>       | <b>48.7%</b>      |
|                            | <b>No</b>       | <b>213</b>       | <b>51.3%</b>      |

194

195 **Health facility factors**

196 The majority 341(82.2%) of the study participants reported that the health facilities lack capacity  
197 to give mental health services. Among the participants, 357(86%) patients perceived that their  
198 nearby health facilities lack medications to treat mental illness (Table 3).

199 **Table 3. Health facility factors affecting perceived level of service accessibility among**  
200 **psychiatric outpatients in Amanuel mental specialized hospital, Addis Ababa, Ethiopia**  
201 **2024 (n= 415)**

| Variables                              | Category | Frequency | Percentages |
|----------------------------------------|----------|-----------|-------------|
| Lack of capacity                       | Yes      | 341       | 82.2%       |
|                                        | No       | 74        | 17.8%       |
| Service non-availability               | Yes      | 310       | 74.7%       |
|                                        | No       | 105       | 25.3%       |
| Lack of medication                     | Yes      | 357       | 86%         |
|                                        | No       | 58        | 14%         |
| Lack of good relationship              | Yes      | 74        | 17.8%       |
|                                        | No       | 341       | 82.2%       |
| Lack of acceptance                     | Yes      | 182       | 43.9%       |
|                                        | No       | 233       | 56.1%       |
| Non-recognition of patient involvement | Yes      | 218       | 52.5%       |
|                                        | No       | 197       | 47.5%       |
| Dissatisfaction by the service         | Yes      | 240       | 57.8%       |
|                                        | No       | 175       | 42.2%       |

202

203

204

205 **Structural factors**

206 The result of this study showed that most (56.6%) of the participants perceived that there was  
207 structural stigma for mental health. About 73.5% of the respondents were lack services  
208 accessibility due to lack of priority for mental health (Table 4).

209 **Table 4. Structural factors affecting perceived level of service accessibility among**  
210 **psychiatric outpatients in Amanuel mental specialized hospital, Addis Ababa, Ethiopia**  
211 **2024 (n= 415)**

| <b>Variables</b>         | <b>Category</b> | <b>Frequency</b> | <b>Percentage</b> |
|--------------------------|-----------------|------------------|-------------------|
| <b>Structural stigma</b> | <b>Yes</b>      | <b>235</b>       | <b>56.6%</b>      |
|                          | <b>No</b>       | <b>180</b>       | <b>43.4%</b>      |
| <b>Lack of priority</b>  | <b>Yes</b>      | <b>305</b>       | <b>73.5%</b>      |
|                          | <b>No</b>       | <b>110</b>       | <b>26.5%</b>      |
| <b>Low scale-up</b>      | <b>Yes</b>      | <b>345</b>       | <b>83.1%</b>      |
|                          | <b>No</b>       | <b>70</b>        | <b>16.9%</b>      |

212

213

214

215

216

217

218

219

220

221

222

223

224

225 **Provider/user factors**

226 Of the respondents 285(71.1%) of them reported that they did not visit there nearby health  
227 facility due to lack of patient involvement in the treatment process. Majority 53.7% of the  
228 respondents did not access mental health services because of self-stigma. (Table 5)

229 **Table.5. Provider/user factors affecting perceived level of service accessibility among**  
230 **psychiatric outpatients in Amanuel mental specialized hospital, Addis Ababa, Ethiopia**  
231 **2024 (n= 415)**

| Variables               | Category | Frequency | Percentage |
|-------------------------|----------|-----------|------------|
| Lack of involvement     | Yes      | 295       | 71.1       |
|                         | No       | 120       | 28.9       |
| Self- stigma            | Yes      | 223       | 53.7       |
|                         | No       | 192       | 46.3       |
| Lack of self esteem     | Yes      | 227       | 54.7       |
|                         | No       | 188       | 45.3       |
| Lack of self-help group | Yes      | 263       | 63.4       |
|                         | No       | 152       | 36.6       |

232  
233  
234  
235  
236  
237  
238  
239  
240  
241  
242  
243  
244

## 245 **Factors associated with perceived mental health service accessibility**

246 We did binary logistic regression analysis in order to find the candidate variables for  
247 multivariable logistic regression analysis. And variables with p-value less than or equal to 0.25  
248 were fitted to multivariable logistic regression analysis. In the bi-variable logistic regression  
249 analysis; sex, Resident, Stigma, Maltreatment, Traditional healers, lack of capacity, service non-  
250 availability, lack of medication, lack of good relationship, lack of acceptance, lack of patient  
251 involvement, dissatisfaction, low scale-up and self-stigma were found to be a candidate variable  
252 for multivariable logistic regression. In the final model, factors significantly associated with  
253 perceived service accessibility were resident and medication access. While variables like age,  
254 marital status, occupation, support structure, economic status of the community, board support,  
255 structural stigma, lack of priority, national policy, lack of patient involvement, lack of self-  
256 esteem, lack of self-help group, were not significantly associated with service accessibility.

257 In multivariable logistic regression analysis, Resident and Medication were significantly  
258 associated with perceived service accessibility. The odds of perceived mental health service  
259 accessibility among service users of urban residents were **3.563 (AOR: 3.563, 95%CI: 1.065,**  
260 **11.915)** higher compared with Rural residents.

261 The odds of perceived service accessibility among respondents who had medication access were  
262 **2.604 times [(AOR=2.604, 95% CI: (1.220, 5.555)]** higher compared with counterparts(Table 6)

263

264

265

266

267

268 **Table 6. Factors associated with perceived level of mental health services accessibility**  
 269 **among psychiatric outpatients in Amanuel Mental Specialized Hospital 2024(n=415)**

| Variables                  | Category | Service-accessibility |     | COR(95% CI)         | AOR(95% CI)                 |
|----------------------------|----------|-----------------------|-----|---------------------|-----------------------------|
|                            |          | Yes                   | No  |                     |                             |
| Sex                        | Male     | 21                    | 222 | 1                   | 1                           |
|                            | Female   | 22                    | 150 | 1.550(0.823,2.919)  | 1.130(0.507,2.253)          |
| Resident                   | Urban    | 40                    | 296 | 3.423(1.031,11.366) | <b>3.563(1.065,11.915)*</b> |
|                            | Rural    | 3                     | 76  | 1                   | <b>1</b>                    |
| Stigma                     | Yes      | 27                    | 268 | 0.655(0.339,1.265)  | 1.152(0.508,2.614)          |
|                            | No       | 16                    | 104 | 1                   | 1                           |
| Mal treatment              | Yes      | 27                    | 256 | 0.765(0.397,1.474)  | 0.889(0.268,2.948)          |
|                            | No       | 16                    | 116 | 1                   | 1                           |
| Traditional Healers        | Yes      | 8                     | 104 | 1.698(0.762,3.781)  | 1.326(0.572,3.077)          |
|                            | No       | 35                    | 268 | 1                   | 1                           |
| Lack of capacity           | Yes      | 29                    | 306 | 0.447(0.224,0.892)  | 0.976(0.156,6.126)          |
|                            | No       | 14                    | 66  | 1                   | 1                           |
| Service non-availability   | Yes      | 26                    | 284 | 0.474(0.246,0.914)  | 1.080(0.333,3.504)          |
|                            | No       | 17                    | 88  | 1                   | 1                           |
| Availability of medication | Yes      | 31                    | 326 | 0.365(0.175,0.760)  | <b>2.604(1.220,5.555)*</b>  |
|                            | No       | 12                    | 46  | 1                   | <b>1</b>                    |
| Lack of good relationship  | Yes      | 4                     | 70  | 0.442(0.153,1.279)  | 1.692(0.570,5.026)          |
|                            | No       | 39                    | 302 | 1                   | 1                           |
| Lack of acceptance         | Yes      | 15                    | 173 | 0.616(0.319,1.192)  | 1.024(0.421,2.491)          |
|                            | No       | 28                    | 199 | 1                   | 1                           |
| Patient involvement        | Yes      | 18                    | 200 | 0.619(0.327,1.173)  | 0.945(0.410,2.177)          |
|                            | No       | 25                    | 172 | 1                   | 1                           |
| Dissatisfaction            | Yes      | 20                    | 220 | 0.601(0.319,1.32)   | 1.062(0.467,2.415)          |
|                            | No       | 23                    | 152 | 1                   | 1                           |
| Low scale-up               | Yes      | 33                    | 312 | 0.635(0.297,1.356)  | 1.517(0.696,3.307)          |
|                            | No       | 10                    | 60  | 1                   | 1                           |
| Self-stigma                | Yes      | 18                    | 205 | 0.587(0.309,1.112)  | 0.845(0.365,1.954)          |
|                            | No       | 25                    | 167 | 1                   | 1                           |

270

271 Note: - \*- Significantly associated at p<0.05

272 1- Reference

273 AOR = Adjusted odds ratio; COR = crude odds ratio; CI = confidence interval

274

## 275 Discussion

276 The present study was conducted in Amanuel Mental Specialized Hospital, and it presents  
277 mental health service users' perception of service accessibility and the barriers to utilizing  
278 mental health services. Accordingly, the perceived level of mental health service accessibility  
279 among mental health service users in Amanuel Mental Specialized Hospital was 10.4%. The  
280 predictors of perceived service accessibility in this study included Resident and Medication  
281 availability.

282 The perceived level of mental health service accessibility among patients attending outpatient  
283 departments in Amanuel Mental specialized hospital was 10.4%. This data was much lower than  
284 the national healthcare access and quality index for Ethiopia 2019 (33 %) that was presented by  
285 the national data management center for health (NDMC). This could be due to mental health care  
286 service barriers including lack of mental health policy, limited professionals and financial  
287 resources, stigma and discrimination towards mental health problems and its treatment.

288 This finding revealed that the odds of perceived service accessibility among urban residents were  
289 almost four times higher compared to rural residents. The findings suggest that a large proportion  
290 of patients travel long distances to access mental health care, primarily located in the country's  
291 capital, Addis Ababa, and this may prevent many people from accessing mental health services.  
292 This finding is consistent with previous research in Nigeria, which showed that long waiting  
293 times and long distances to access mental health services are barriers to service use, especially  
294 among rural populations (20). Another study showed that depressed patients living 30 to 60  
295 miles away from psychiatric health services were less likely to receive therapy compared to those  
296 who were living within shorter distances(21). Another study found that depressed patients who

297 lived 30 to 60 miles from psychiatric health services were less likely to receive treatment than  
298 those who lived a shorter distance(22)

299 In the present study, availability of medication was significantly associated with perceived  
300 mental health service accessibility; the odds of perceived mental health service accessibility  
301 among respondents who had medication access were nearly three times more likely compared to  
302 counterparts. Offering free psychiatric medication to psychiatric patients and their inclusion in  
303 the health insurance was recommended by some psychiatrists as a way of increasing mental  
304 health services utilization and access in Sudan. Health insurance coverage as a successful policy  
305 to improve patient's access to psychiatric medications was suggested by policymakers in the  
306 previous study in Sudan(23). Furthermore, increasing the availability of essential psychiatric  
307 medications was recommended by the WHO(24) to strength mental health system in Sudan. This  
308 is not different in Ethiopia. The Ethiopian government implements community based health  
309 insurance system to increase the utilization of health services and reduced the incidence of  
310 catastrophic health expenditure.

311

312

313

314

315

316

317

318

319

320



## 321        **Strength and Limitations of the Study**

322        The study addressing adequate sample size. To the best of the researcher’s knowledge this is the  
323        first study to assess the perceived service accessibility among mental health service users were  
324        the strength of the study. The study has been restricted only to mental health service users in  
325        Amanuel Mental Specialized Hospital. Since this is a cross-sectional study it does not show the  
326        casual relationship between service accessibility and mental health was the limitations of this  
327        study.

## 328        **Conclusions**

329        The study observed that the prevalence of perceived mental health service accessibility was  
330        found to be low in this study. Availability of medication and urban resident are the factors  
331        associated with perceived level of mental health service accessibility. There were many barriers  
332        to utilizing the services. There is still lack of awareness of mental health and mental health  
333        issues, and services have not yet reached those in need. The service needs to reach the  
334        communities, especially the remote areas. Appropriate coordination and collaboration between  
335        different mental health service providers is necessary. To improve the utilization of mental health  
336        services, a periodical evaluation must be carried out.

337

338

339

340

341

342

343

344

## 345 Acronyms and Abbreviations

346

347 AOR: -Adjusted Odds Ratio

348 CI: - Confidence Interval

349 COR: -Crude Odds Ratio

350 DC: -Data Collector

351 DALYs: Disability Adjusted Life Years

352 ETB: -Ethiopia Birr

353 LMICs: Low and Middle Income Countries

354 MH: Mental Health

355 OPD: Out Patient Department

356 PI: -Principal Investigator

357 SPSS: -Statistical Package for the social sciences

358 WHO: -World Health Organization

359 YLDs: Years Lived with Disability

360

361

362

363

364

365

366

367

368

369

## 370 **Declarations**

### 371 **Ethics approval and consent to participations**

372 Ethical approval was obtained from Ethical Review Board of Amanuel Mental Specialized  
373 Hospital. Written informed consent was obtained from each participant. The natures of the study  
374 was explained, which required answering of questions and no invasive procedure or associated  
375 risks were involved. They were also having informed of opting out of the study at any point  
376 without any penalty, should they decide to leave. Anonymity and confidentiality of information  
377 obtained was assured and maintained.

### 378 **Consent for publication**

379 Not applicable

### 380 **Availability of data and materials**

381 “All the data supporting the results are within the manuscript. Additional detailed information  
382 and raw data are available from the corresponding author on logical request.”

### 383 **Competing interests**

384 The authors declare that there are no financial and non-financial conflicts of interest regarding  
385 the publication of this paper.

### 386 **Funding**

387 This research was not financed by any grant organization

### 388 **Authors' contributions**

389 "S.A. and K.H. conduct study design, data collection, data analysis and manuscript preparation  
390 and W.L. and S.A. perform study design and manuscript preparation and A.C. wrote the main  
391 manuscript text. Finally, all authors reviewed, finalized, and approved the manuscript."

392

393

394

395 **Acknowledgements**

396 The authors would like to thank Amanuel Mental Specialized Hospital for its technical support.  
397 We are also extended our appreciation to the study participants and data collectors.

398 **Authors' information**

- 399 1. SA, Department of research and training, Amanuel Mental Specialized Hospital,  
400 Addis Ababa, Ethiopia
- 401 2. KH, Department of research and training, Amanuel Mental Specialized Hospital,  
402 Addis Ababa, Ethiopia
- 403 3. WL, Department of research and training, Amanuel Mental Specialized Hospital,  
404 Addis Ababa, Ethiopia
- 405 4. SA, Department of research and training, Amanuel Mental Specialized Hospital,  
406 Addis Ababa, Ethiopia
- 407 5. AC, Department of psychiatry, Amanuel Mental Specialized Hospital, Addis Ababa,  
408 Ethiopia

409  
410  
411  
412  
413  
414  
415  
416  
417  
418

## 419 References

420

- 421 1. Papastergiou J, Donnelly M, Li W, Sindelar RD, van den Bemt B. Community Pharmacy-  
422 Based eGFR Screening for Early Detection of CKD in High Risk Patients. *Can J Kidney*  
423 *Heal Dis.* 2020;
- 424 2. Ruzek JI, Yeager CM. Internet and mobile technologies: addressing the mental health of  
425 trauma survivors in less resourced communities. *Glob Ment Heal.* 2017;
- 426 3. World Health Organization. Autism spectrum disorders & other developmental disorders:  
427 From raising awareness to building capacity. World Health Organization. 2013.
- 428 4. Galderisi S, Heinz A, Kastrup M, Beezhold J, Sartorius N. Toward a new definition of  
429 mental health. *World Psychiatry.* 2015.
- 430 5. Susukida R, Mojtabai R, Mendelson T. SEX DIFFERENCES in HELP SEEKING for  
431 MOOD and ANXIETY DISORDERS in the NATIONAL COMORBIDITY SURVEY-  
432 REPLICATION. *Depress Anxiety.* 2015;
- 433 6. Vos T, Allen C, Arora M, Barber RM, Brown A, Carter A, et al. Global, regional, and  
434 national incidence, prevalence, and years lived with disability for 310 diseases and  
435 injuries, 1990–2015: a systematic analysis for the Global Burden of Disease Study 2015.  
436 *Lancet.* 2016;
- 437 7. Bashshur RL, Shannon GW, Bashshur N, Yellowlees PM. The Empirical Evidence for  
438 Telemedicine Interventions in Mental Disorders. *Telemed e-Health.* 2016;
- 439 8. Gilbert BJ, Patel V, Farmer PE, Lu C. Assessing Development Assistance for Mental  
440 Health in Developing Countries: 2007–2013. *PLoS Med.* 2015;
- 441 9. Rebello TJ, Marques A, Gureje O, Pike KM. Innovative strategies for closing the mental  
442 health treatment gap globally. *Current Opinion in Psychiatry.* 2014.
- 443 10. Media Team WHO. WHO Newsletter: Highlights urgent need to transform mental health  
444 and mental health care. World Health Organization. 2022;
- 445 11. Semrau M, Alem A, Ayuso-Mateos JL, Chisholm D, Gureje O, Hanlon C, et al.  
446 Strengthening mental health systems in low- and middle-income countries:  
447 recommendations from the Emerald programme. *BJPsych Open.* 2019;
- 448 12. St. John L, Walmsley R. The Latest Treatment Interventions Improving Mental Health  
449 Outcomes for Women, Following Gender-Based Violence in Low-and-Middle-Income  
450 Countries: A Mini Review. *Frontiers in Global Women’s Health.* 2021.
- 451 13. Nugraha S, Ohara-Hirano Y. Mental Health Predictor of the Sixth Batch Indonesian Nurse  
452 and Certified Care Worker Candidates Migrate to Japan under the Japan–Indonesia  
453 Economic Partnership Agreement in Pre-migration Stage. *J Heal Sci.* 2014;
- 454 14. Reed GM, First MB, Kogan CS, Hyman SE, Gureje O, Gaebel W, et al. Innovations and  
455 changes in the ICD-11 classification of mental, behavioural and neurodevelopmental  
456 disorders. *World Psychiatry.* 2019;

- 457 15. Getinet W, Amare T, Boru B, Shumet S, Worku W, Azale T. Prevalence and Risk Factors  
458 for Antenatal Depression in Ethiopia: Systematic Review. *Depress Res Treat*. 2018;
- 459 16. Abbay AG, Mulatu AT, Azadi H. Community knowledge, perceived beliefs and  
460 associated factors of mental distress: A case study from Northern Ethiopia. *Int J Environ*  
461 *Res Public Health*. 2018;
- 462 17. Hanlon C, Alem A, Lund C, Hailemariam D, Assefa E, Giorgis TW, et al. Moving  
463 towards universal health coverage for mental disorders in Ethiopia. *Int J Ment Health*  
464 *Syst*. 2019;
- 465 18. Hailemariam M, Fekadu A, Medhin G, Prince M, Hanlon C. Equitable access to mental  
466 healthcare integrated in primary care for people with severe mental disorders in rural  
467 Ethiopia: A community-based cross-sectional study. *Int J Ment Health Syst*. 2019;
- 468 19. Nigussie ZY, Zemicheal NF, Tiruneh GT, Bayou YT, Teklu GA, Kibret ES, et al. Using  
469 mhealth to improve timeliness and quality of maternal and newborn health in the primary  
470 health care system in ethiopia. *Glob Heal Sci Pract*. 2021;
- 471 20. I.O. JI, L. U. Barriers to mental health services utilization in the Niger delta region of  
472 nigeria: Service users' perspectives. *Pan African Medical Journal*. 2013.
- 473 21. Bris A, Wang tyh, zatzick cd, miller djp, fern mj, cardinal lb, et al. knights, raiders, and  
474 targets - the impact of the hostile takeover - coffee,jc, lowenstein,l, roseackerman,s. *j bank*  
475 *financ*. 2021;
- 476 22. Ambikile JS, Outwater A. Challenges of caring for children with mental disorders:  
477 Experiences and views of caregivers attending the outpatient clinic at Muhimbili National  
478 Hospital, Dar es Salaam - Tanzania. *Child Adolesc Psychiatry Ment Health*. 2012;
- 479 23. Muhorakeye O, Biracyaza E. Exploring Barriers to Mental Health Services Utilization at  
480 Kabutare District Hospital of Rwanda: Perspectives From Patients. *Front Psychol*. 2021;
- 481 24. Brenman NF, Luitel NP, Mall S, Jordans MJD. Demand and access to mental health  
482 services: A qualitative formative study in Nepal. *BMC Int Health Hum Rights*. 2014;
- 483
- 484
- 485
- 486
- 487
- 488
- 489
- 490
- 491
